32 **Summary:**

33 **Background:**

34 The study "HI-Herz.BIKE Saar" (August 2017 - September 2019) examined the  
35 health benefits and training effect of e-bikes (pedelecs) in patients from  
36 ambulatory heart groups with moderate chronic heart failure (CHI).

37

38 **Method:**

39 10 subjects with NYHA stage II-III and a left ventricular ejection fraction LVEF  
40 of  $\leq 50\%$  were selected. The presented study is explicitly marked as a pilot  
41 study.

42 The new HeartGo<sup>®</sup> system used here for the first time allows heart rate  
43 controlled training on a special pedelec via a smartphone app. The groups  
44 were accompanied during the training rides by a doctor and a paramedic. No  
45 cardiac complications occurred. The training units were increased in duration,  
46 distance and target frequency every six months.

47 Frequency behaviour, pedaling and motor load on the pedelec as well as  
48 climatic data such as ejection fraction, a biomarker (NT-pro BNP), risk factors,  
49 arterial blood pressure and ergometric courses were measured.

50

51 **Results:**

52 The power tolerance increased by almost 2.5 times, a discrete decrease of the  
53 resting heart rate by 3.7% was observed and pedaling power improved  
54 accordingly. In the clinical data the ergometric power increased by 44% and  
55 the LVEF improved by 29%. The NT-pro BNP value decreased by 27%. Body  
56 Mass Index BMI remained constant at 27 and cholesterol levels showed no  
57 significant changes.

58

59 **Conclusions:**

60 Pedaling according to this pilot study with its methodological limitations of  
61 low number was safe and accompanied by significant health benefits. The  
62 subjects were enthusiastic and satisfied with this form of training. This  
63 training form can therefore be recommended to heart group participants

64 under certain medical conditions and can be used in the training process. The  
65 results of this pilot study with its methodological weaknesses should be  
66 verified in a larger follow-up study.

67

68 **Key words:**

69 **Pedelec, e-bike, heartrate control, cardiac failure, physical activity**

70

71

72

73

74

75

76

77

78

79

80

81

82

83

84

85

86

87

88

89

90

91

92

93

94

95

96 **Introduction**

97

98 Regular physical activity with endurance and strength training is one of the  
99 secondary prevention measures for cardiovascular diseases with high  
100 prevalence (1,2). Early rehabilitation should begin in hospital (phase I), be  
101 continued in a rehabilitation clinic or as an outpatient close to home (phase II)  
102 and then (phase III) preferably in outpatient heart groups (AHG).

103 A moderate training of 5x30 min or 150 min/week as an effective training goal  
104 is aimed at, but often not achieved in heart groups. Endurance sports like  
105 walking, running or swimming are recommended. Cycling in heart groups is  
106 done less frequently because the performance in the groups is different.

107 Numerous studies have shown that cycling improves endurance, coordination,  
108 flexibility and strength; at the same time, the body weight is not carried, so  
109 that this sport is also used very well in the case of overweight and is  
110 advantageous for heart patients. There is no structured offer for cycling as a  
111 rehabilitation sport, especially for patients with heart failure. Here, the  
112 recommendations were reserved, since patients with heart failure are usually  
113 older participants and because of possible cardiac incidents or accidents, it is  
114 assumed that cycling training is dangerous.

115 Here, electrically assisted cycling is a good option, especially since the pedelec  
116 is becoming increasingly popular with seniors. Initial studies show that in  
117 overweight people, an improvement in spiroergometric readings is possible  
118 using e-bikes (3).

119

120 The disadvantage is that older riders usually choose a high pedaling power  
121 support because it is "easier" to ride. This reduces the actually desired  
122 training effect; there is "gentle riding".

123 With a heart rate-controlled system, this relieving posture is avoided. This  
124 results in individual stress and comparable loads. This makes controlled  
125 endurance training on the pedelec, similar to stationary ergometry, possible  
126 as an option in addition to regular training. Studies on this method are not  
127 available.

128 Also a scientific evaluation is then easier to realize, especially since the  
129 benefits and risks of regular training of the rehabilitation phase III in  
130 outpatient heart groups have not been sufficiently scientifically investigated.  
131 Haberecht et al (2013; 4) report on insufficient lifestyle changes and about too  
132 little physical activity in heart groups, which is, however, considered sufficient  
133 by others (5). It should be noted that participation in a heart group once a  
134 week and often less than 45 minutes is insufficient for an efficient training  
135 program.

136 Reports on the use and value of such pedelec assistance systems have not yet  
137 been published, apart from some publications on the general use of pedelecs  
138 by athletes and seniors with diabetes mellitus (6).

139 10 subjects with a strictly defined NYHA stage II-III and a LVEF of  $\leq 50\%$  were  
140 selected. The presented study is explicitly marked as a pilot study, as a new,  
141 so far not tested technique was used for exercise control. When selecting the  
142 heart failure patients defined in this way, a higher number of subjects could  
143 not be reached at only one study centre.

144  
145  
146  
147  
148  
149  
150  
151  
152  
153  
154  
155  
156  
157  
158

159                    **Methodology**

160                    In this pilot study the novel system HeartGo<sup>®</sup>, which was tested for  
161                    practicability by preliminary investigations, was used. This frequency-based  
162                    system automatically controls the training process. Training and clinical  
163                    parameters were measured. Training was carried out in summer on level  
164                    paths along the Saar river ("outdoor" training), in winter inside a sports hall  
165                    ("indoor" training).

166  
167                    Anthropometric and demographic data at the beginning:  
168                    Period 22.8.17 - 10.09.19 with 93 trainings, 31" indoor", 62 "outdoor".  
169                    Number of cases N=10 with a participation frequency of over 90%.  
170                    The age was 61.5 (range 43-82) years, 2 participants were female and 8 male,  
171                    the average BMI was 27 (range 21-37).  
172                    The default training or target frequency fraud 96 (range 83-116) beats/min.

173  
174                    For further details see Suppl. 02  
175

176 **Results:**

177 **Technical results:**

178 The user-friendliness of the system fluctuated strongly in the beginning. This  
179 was fixed within 4 weeks.

180 At the beginning of the study the stability of the chest sensors also fluctuated.

181 The charge of the used batteries often did not last for the whole training  
182 duration; they had to be replaced. The Bluetooth coupling was also not stable.

183 During the duration of the study the disturbances could be minimized.

184

185 **Clinical results**

186 The results (blood tests, echocardiography and functional changes) are  
187 presented in detail in Tables 3-7 (Suppl. 03).

188

189 A questionnaire on well-being before the start and after the end of the study  
190 (Suppl.04) showed (Fig. 1A) that subjective well-being improved significantly  
191 during the study.

192

193 The ratings of perceived exertion (Fig. 1B) (18) on the BORG scale were  
194 between 9 and 13, so that subjectively a rather moderate perceived exertion  
195 can be assumed. The average rating was 11 = "quite easy".

196

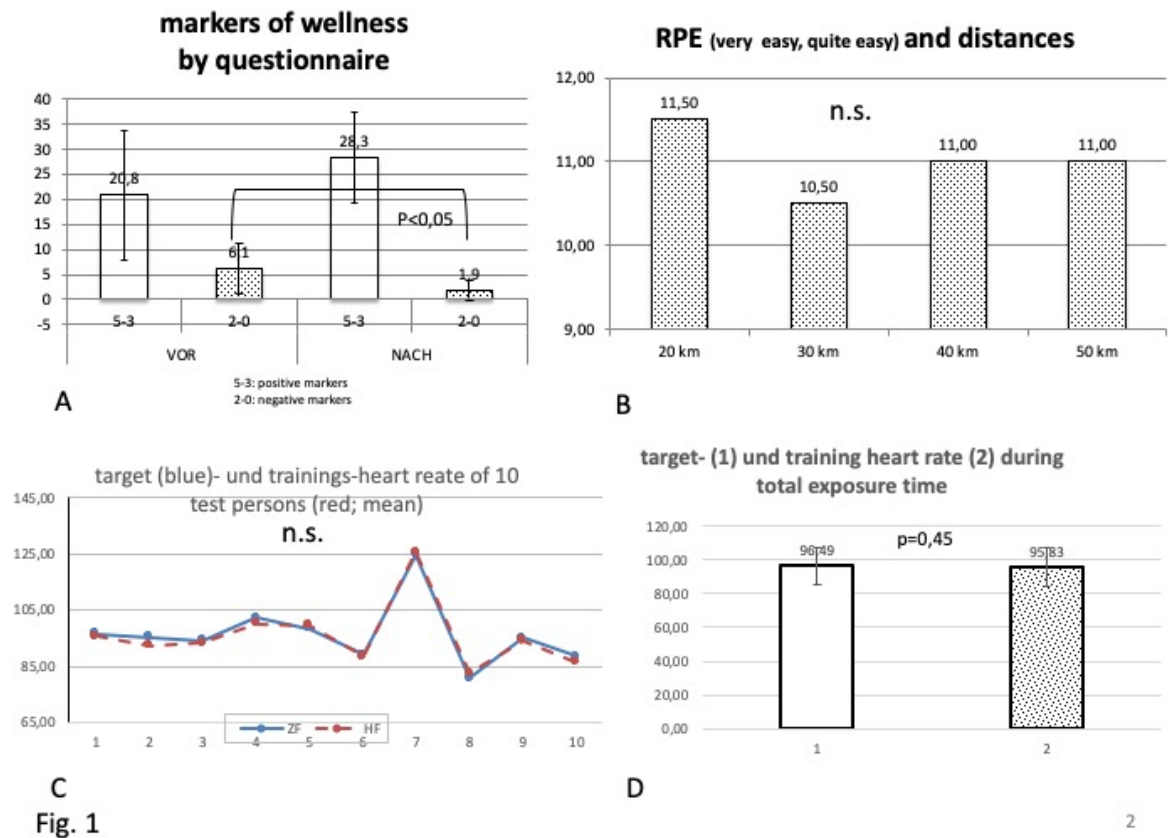

Fig. 1

2

197

198

199

200

201

202

203 The training showed a significant increase in performance:

204 The ergometry power (in Watt) increased from 91.67 to 132.5 Watt,

205 corresponding to 45%. (Fig. 2A)

206

207 The echocardiographically measured LVEF increased significantly from 44.1 to

208 56.6%. This corresponds to an increase of 29% (Fig. 2B).

209

210 Outpatient systolic blood pressure at the beginning and end of the study

211 decreased significantly from 128.5 to 115 mm Hg (a decrease of 11%) (Fig. 2C)

212



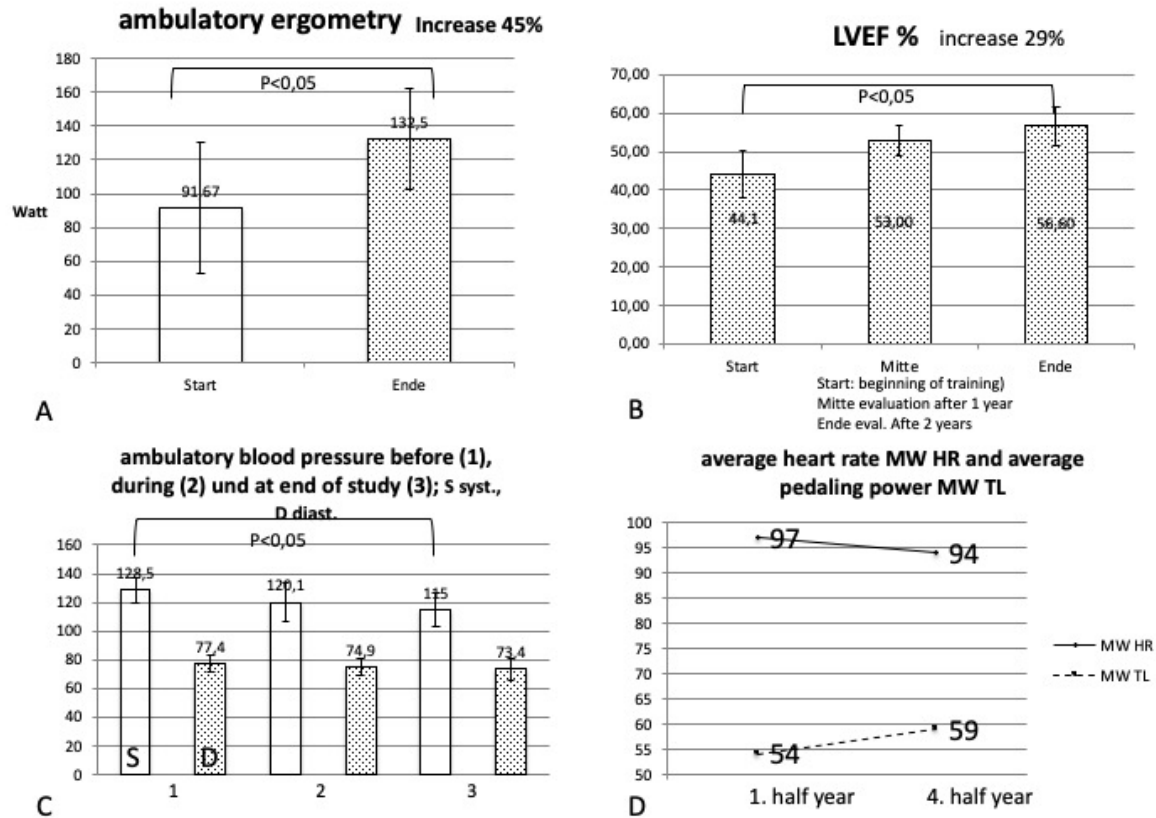

Fig. 2

ENTWURF

3

213

214

215

216

217

218

219

220

221

#### Laboratory parameters:

222

NT-pro BNP: (see Table 3) The initially increased values in all subjects

223

decreased significantly (decrease of 27.2%;  $p > 0.05$ ).

224

225

Less noticeable were the values of the lipid status, i.e. total cholesterol, LDL

226

and HDL cholesterol and triglycerides. This only showed trends, but no

227

significant changes. All test persons were undergoing statin therapy at the

228

time of the study.

229

230 At the beginning, in the middle and at the end a 6-minute walking test was  
231 performed. This showed a non-significant trend towards improvement  
232 (increase of 7.3%).

233

234

235 **Complications and side effects during training:**

236 At the beginning and at the end of the duration of training there were two  
237 incidents (2.15%):

238 In one patient, a sudden fall from the ride from a bicycle with suspected  
239 cardiac syncope. An efficient first aid was given, but also a stay in hospital due  
240 to a fracture of the humerus. The cause of the syncope remained  
241 unexplained. No consequential damage occurred.

242 Another subject had an accident with a fall due to an unsafe road (driving over  
243 grass). There was also a fracture of the upper arm with hospitalization. No  
244 consequential damage occurred.

245 There were no incidents due to heart failure, and in a small number of cases it  
246 was necessary to re-hospitalize the patient for training.

247

248 The blood pressure values (systolic and diastolic) were measured by means of  
249 wrist gauges before, after half distance and at the end.

250 The systolic values decreased significantly by 11.6%. The resting blood  
251 pressure values measured at the beginning of each training session could  
252 confirm this trend: they also decreased by about 10%.

253

254 **Discussion:**

255 The results of the present pilot study show that training with a heart rate  
256 controlled pedelec leads to a measurable and significant benefit in patients  
257 with heart failure.

258 Cycling in general is one of the most suitable endurance sports for heart  
259 patients, since the body weight does not have to be carried.

260 However, it is used too rarely, especially by patients with heart failure.

261 Especially for the group of people examined here, namely elderly people with  
262 heart disease, an individually dosed and moderate load according to medical  
263 guidelines is necessary. Electrically assisted cycling with a pedelec therefore  
264 represents a sensible and attractive alternative for these patients. However, it  
265 is still unknown whether and under which conditions a group of patients  
266 defined in this way will benefit from pedelec riding. It was also unclear  
267 whether this technology is safe enough to recommend the electric bicycle as a  
268 training device for cardiac patients in general and for those with heart failure.

269 It should be noted that patients with heart failure who were previously  
270 deprived of physical activity are now recommended endurance sports with a  
271 high level of evidence and recommendation (IA), and that these sports  
272 provide a high benefit.

273 Studies such as the HF-Action study (7), Keteyian et al 2018 (8), the CROS  
274 study (9) conclude that the health benefit (mortality reduction) is  
275 considerable and is between 20 and 40%. For some of the parameters  
276 measured in this study (e.g. ejection fraction) this has also been proven in  
277 comparable studies. Erbs et al (10) report that the EF in a verum group of  
278 about 16 patients improved by 10.2% compared to a control group.

279  
280 Studies on the special question of heart failure patients with the described  
281 experimental design are not yet available.

282 There are isolated indications (11) that the pedelec offers advantages  
283 compared to the "normal" bicycle and at least does not cause any loss of  
284 training.

285 The use of heart rate as a target and control variable is an adequate and  
286 recognized variable in endurance sports. The training effect can be read from  
287 it (12). This is because it shows itself in a higher load tolerance, an increasing  
288 peak VO<sub>2</sub> and a decreasing heart rate at constant load. Adequate frequency  
289 control is therefore a desired prerequisite for such a training.

290 The present system HeartGo with an Android app on a commercially available  
291 smartphone meets this requirement in an optimal way. In the described  
292 training mode, the system allows the use of the heart rate as control variable.  
293 This works very well, even if the stability, especially that of the sensors, was in  
294 need of improvement. This can be clearly seen in the figures 1C and 1 D,  
295 which show that optimum frequency control is achieved over the entire  
296 training period.

297 The system was tested in a pilot project (MentorBike 4) (13) on patients in the  
298 stationary rehabilitation phase II of a rehabilitation clinic and was judged to  
299 be practicable with high acceptance. However, the duration of the test was  
300 limited to three months, so it was appropriate to test and evaluate the app  
301 over a longer period of time.

302  
303 The present study was designed as a 2-year pilot study with prospective  
304 design. Due to the low number of test persons, the results are only of limited  
305 significance. Nevertheless, studies with a low number of subjects lead to  
306 meaningful results, for example in the case of questions on physical activity in  
307 heart failure (19).

308 Parameters for objective recording of training data on the pedelec are not  
309 available at this time. In general, the training efficiency of heart groups has  
310 not been sufficiently investigated, although this physical training has been a  
311 central component of holistic rehabilitation sport for more than 40 years with  
312 a high level of acceptance. Buchwalski et al. (2002) (5) showed a considerable  
313 increase in performance by about 50%, but no effect on the "classic" risk  
314 factors. However, final statements about the validity of heart groups are  
315 missing. (14, 15). The safety of physical training in heart failure patients is  
316 classified as high, depending on the severity of the condition. However, it has

317                   been shown that the benefit clearly exceeds the risk (16). This could be  
318                   confirmed in the study presented. In relation to the total number of 93  
319                   training units, the incident rate is 2.15%. In contrast, there is an average  
320                   benefit of 28.6%, based on all significant changes (ergometry, ejection  
321                   fraction, blood pressure behaviour, biomarkers).

322  
323                   For high-risk patients such as the group of test persons at the introduction of  
324                   a pedelec concept, medical and paramedical supervision is necessary. The test  
325                   persons should be thoroughly trained at the beginning of the training.

326  
327                   If we take as a measure of acceptance the sensation of exertion of the load up  
328                   to 150 min or 50 km final load the sensation of load according to the BORG  
329                   scale, this value remains constant at 11 until the end of the study. The ratio of  
330                   distance (driving distance) to BORG value (18) then increases 2.5 times as an  
331                   indication of a significant improvement in performance.

332  
333                   The clinical data such as increase in left ventricular ejection fraction LVEF,  
334                   ergometry, 6-minute walking test (6MWD) (14,17), the decrease in the  
335                   biomarker NT-pro-BNP or systolic blood pressure indicate a measurable  
336                   improvement, even if a progression or therapy-related bias due to  
337                   uncontrolled domestic activity or medically indicated changes in therapy  
338                   cannot be excluded.

339                   Further training effects of decrease in cardiovascular risk factors were  
340                   discernible in the trend.

341                   The decrease in heart rate and the increased pedaling load correspond to a  
342                   moderate training effect (19), which also did not change substantially during  
343                   the performance increase.

344  
345                   Some of the measured parameters, such as ejection fraction and the NTpro-  
346                   BNP values, show an improvement in prognosis. However, hard endpoints  
347                   require a longer observation period, as Taylor et al. 2019 (19) demonstrated.

348 Further studies with a larger number of test persons are therefore necessary  
349 for further clarification.

350

351

352

353

354

355

356

357

358

359

360

361

362

363

364

365

366

367

368

369

370

371

372

373

374

375

376

377 **Conclusion and Key messages:**

378

379 The described method of heart rate-controlled cycling on a pedelec in  
380 patients with heart disease is effective and acceptance was high.

381 After careful instruction and practice, this form of training can also be  
382 recommended to patients for leisure time activities and training.

383

384 1. training of patients with moderate heart failure on the e-bike (pedelec) is  
385 possible, safe and improves the clinical condition of the existing underlying  
386 disease

387 2. a sustainable training effect for this group could be proven in the presented  
388 two-year pilot study.

389 3. the indicators of well-being and performance tolerance increased  
390 significantly and the blood pressure values decreased accordingly during the  
391 study period.

392 4. the objective performance parameters such as ergometry load and the 6-  
393 minute walking test improved.

394 5. the initially decreased left ventricular ejection fraction increased  
395 significantly.

396 6. the positive results of this pilot study with 10 subjects require verification  
397 by a multi-center follow-up study.

398

399

400        **References:**

- 401        1. Löllgen H Gesundheit, Bewegung und körperliche Aktivität (2015) Dtsch. Z.  
402                Sportmed.,66,139  
403
- 404        2. Steinacker, JM, Liu Y et al. Körperliches Training bei Patienten mit Herzinsuffizienz  
405                Dtsch.(2004) Z. Sportmed. 55, 124  
406
- 407        3. Höchsmann C, Meister S, Gehrig D, Gordon E, Yanlei Nussbaumer LM, Rossmeissl A,  
408                Schäfer J, Hanssen H, Schmidt-Trucksäss A  
409                Effect of E-Bike Versus Bike Commuting on Cardiorespiratory Fitness in Overweight  
410                Adults: A 4-Week Randomized Pilot Study  
411                Clinical Journal of Sport Medicine (2018). 28(3):255–265  
412
- 413        4. Haberecht, O, A Bärsch-Michelmann (2013), Herzgruppen in Deutschland: Stand und  
414                Perspektiven. Herzmedizin 4, 33-38  
415
- 416        5. Buchwalski G, Buchwalsky R, Held K, (2002) Langzeitwirkungen der Nachsorge in  
417                einer ambulanten Herzgruppe. Eine Fall-/Kontrollstudie. Z. Kardiol. 91:139  
418
- 419        6. Cooper AR, B Tibbitts, C England, D Procter, A Searle, SJ Sebire, E Ranger, ALS Page,  
420                (2018) Potential of electric bicycles to improve the health of people with Type 3  
421                Diabetes: a feasibility study. Diabet. Med. 00:1-4  
422
- 423        7. O’Connor CM, Whellan, D, L. Lee, K, Keteyian, S, Cooper, LS, et al. Efficacy and Safety  
424                of Exercise Training in Patients With Chronic Heart Failure HF-ACTION Randomized  
425                Controlled Trial JAMA (2009), 301,1439-1450  
426
- 427        8. Keteyian S, Kerrigan SJ, Lewis B, Ehrman B, Brwander CA Exercise Training workloads  
428                in cardiac rehabilitation are associated with clinical outcomes in pt. With heart  
429                failure Am Heart J. 2018, 204, 76-82  
430
- 431        9. Rauch B, Constantinos H D, Doherty P, Saure D, Metzendorf M, Salzwede A, Völler H,  
432                Jensen K, Schmid JP; The prognostic effect of cardiac rehabilitation in the era of  
433                acute revascularisation and statin therapy: A systematic review and meta-analysis of  
434                randomized and non-randomized studies – The Cardiac Rehabilitation Outcome  
435                Study (CROS) Europ.J.Preventive Card.(2016), 26  
436
- 437        10. Erbs S1, Höllriegel R, Linke A, Beck EB, Adams V, Gielen S, Möbius-Winkler S, Sandri  
438                M, Kränkel N, Hambrecht R, Schuler G.  
439                Exercise training in patients with advanced chronic heart failure (NYHA IIIb) promotes  
440                restoration of peripheral vasomotor function, induction of endogenous regeneration,  
441                and improvement of left ventricular function.  
442                Circ Heart Fail. (2010);3(4):486-94.  
443
- 444        11. Peterman HE et al. Pedelects as a physically active transportation mode Eur. J.  
445                Appl.Physiol. 2016 116, 1565  
446



- 447 12. Vanhees L, De Sutter J, Geladas N, et al. Importance of characteristics and modalities  
448 of physical activity and exercise in defining the benefits to cardiovascular health  
449 within the general population: Recommendations from the EACPR (Part I). Eur J Prev  
450 Cardiol 2012; 19: 670–686.  
451
- 452 13. Emrich, A, Leonhardt, F, Werth, D, Loos, P roactive Assistance for Device-Integrated  
453 Training Adjustment in Outdoor Rehabilitation Training . Congressmitteilung DFKI  
454 Saarbrücken 2016  
455
- 456 14. Graf C1, Bjarnason-Wehrens B1, Löllgen H  
457 Ambulante Herzgruppen in Deutschland – Rückblick und Ausblick  
458 DEUTSCHE ZEITSCHRIFT FÜR SPORTMEDIZIN (2004) 12,339-346  
459
- 460 15. Benzer B, Rauch B, Schmid JP, Zwisler A, Dendale P et al. (2017)  
461 Exercise-based cardiac rehabilitation in twelve European countries results of the  
462 European cardiac rehabilitation registry  
463 International Journal of Cardiology 228, 58–67  
464
- 465 16. Steinacker JM, Liu Y, Stilgenbauer F, Nething K  
466 Körperliches Training bei Patienten mit Herzinsuffizienz  
467 DEUTSCHE ZEITSCHRIFT FÜR SPORTMEDIZIN Jahrgang 55, Nr. 5 (2004) 124-130  
468
- 469 17. Gordon H. G, Sullivan MJ, Thompson PJ, Fallen EL, Pugsley SO, Taylor W, B. Berman LB  
470 The 6-minute walk: a new measure of exercise capacity in patients with chronic heart  
471 failure  
472 Can. Med. Ass (1985) 132, 919  
473
- 474 18. Williams N, The Borg Rating of Perceived Exertion (RPE) scale  
475 Occupational Medicine 2017; 67: 404–405  
476
- 477 19. Taylor RS, Long, L, IMordi, IR  
478 Exercise-Based Rehabilitation for Heart Failure, Cochrane Systematic Review, Meta-  
479 Analysis, and Trial Sequential Analysis (2019) Heart Failure VOL. 7, NO. 8, 2019  
480  
481

482

483

484

485

486

### markers of wellness by questionnaire

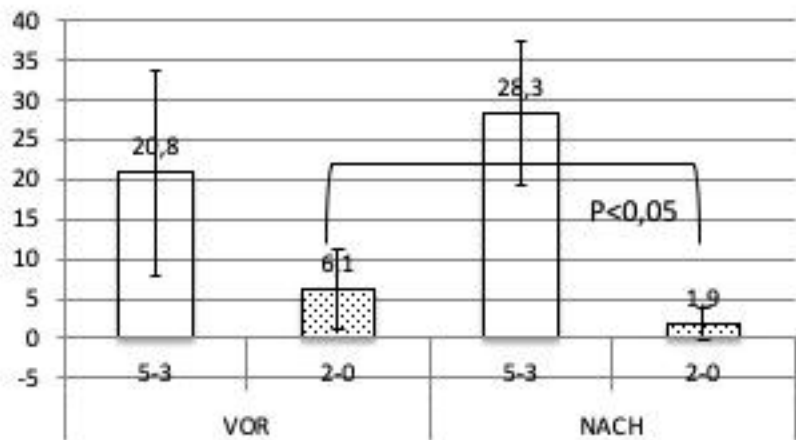

5-3: positive markers  
2-0: negative markers

A

### RPE (very easy, quite easy) and distances

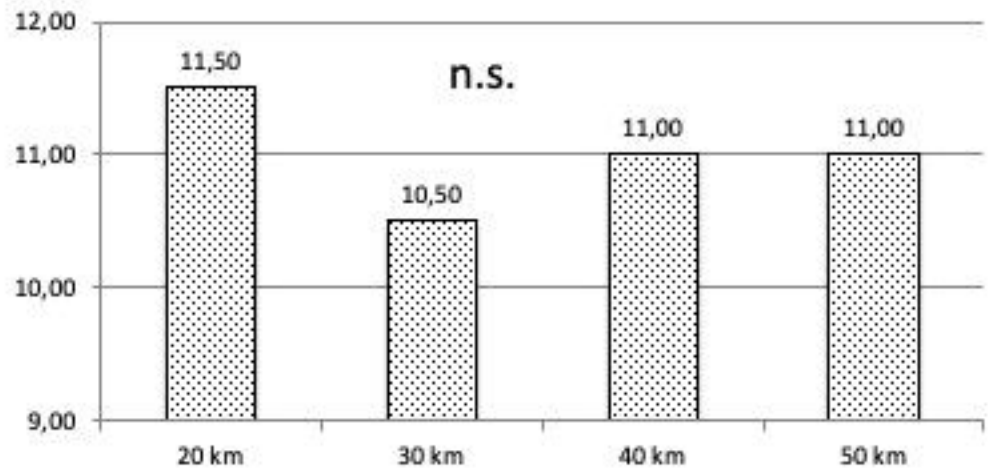

B

### target (blue)- und trainings-heart reate of 10 test persons (red; mean)

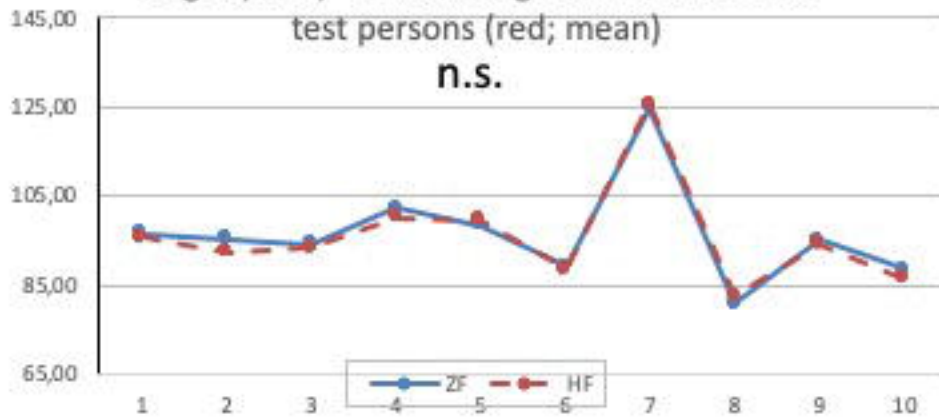

C

Fig. 1

### target- (1) und training heart rate (2) during total exposure time

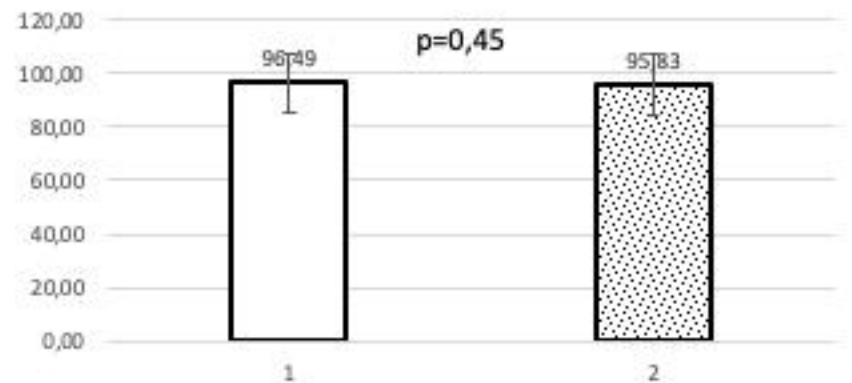

D

**ambulatory ergometry Increase 45%**

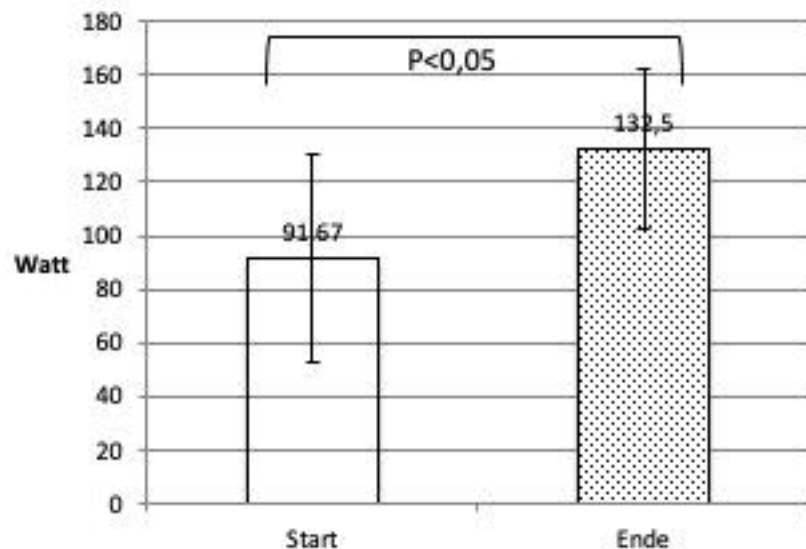

A

**LVEF % increase 29%**

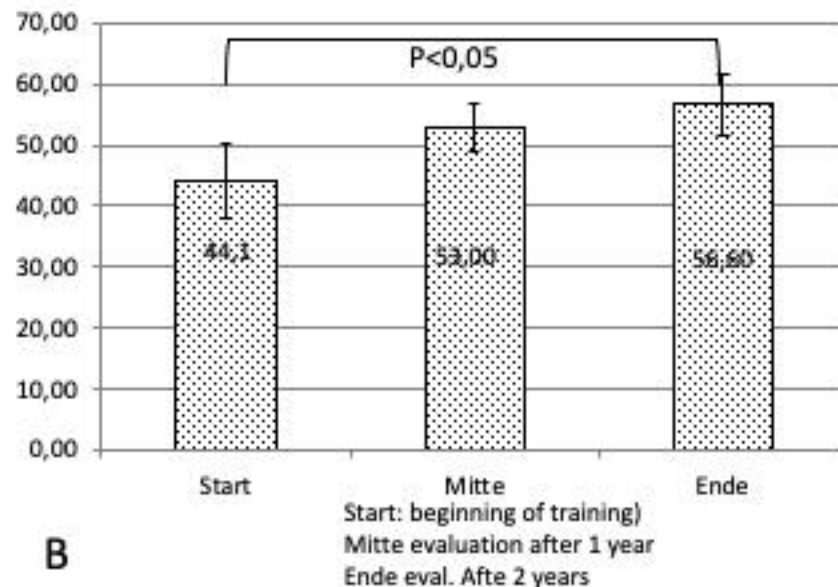

B

**ambulatory blood pressure before (1), during (2) und at end of study (3); S syst., D diast.**

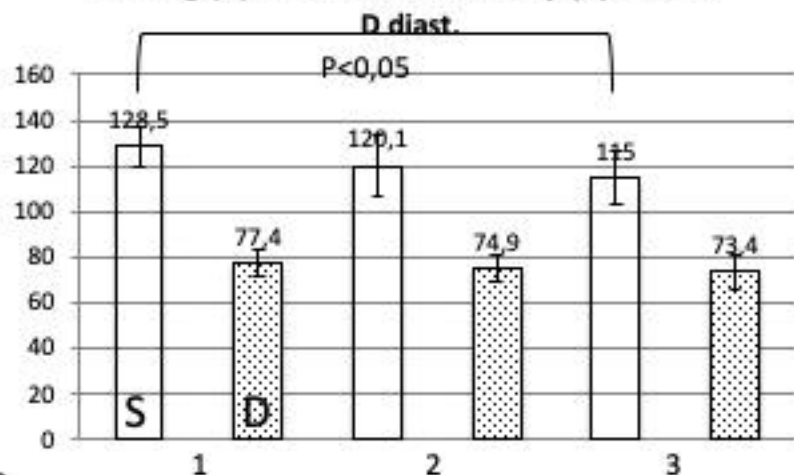

C

**average heart rate MW HR and average pedaling power MW TL**

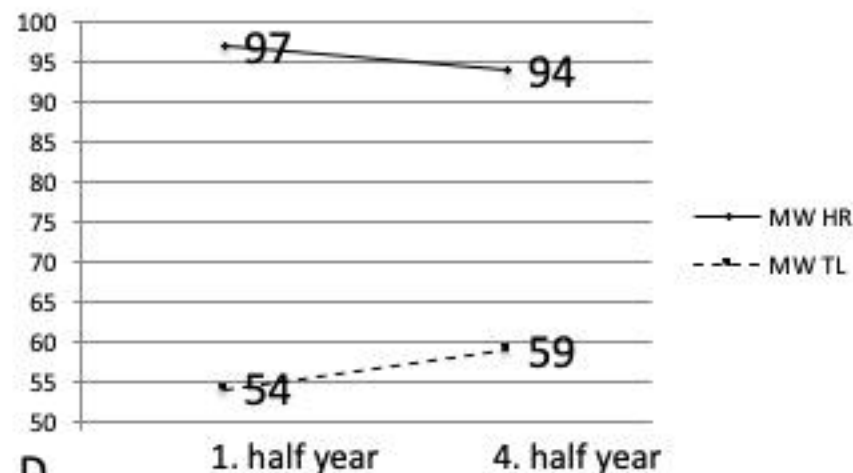

D

Fig. 2
